# Supplementary material for: Targeting of BMI-1 expression by the novel small molecule PTC596 in mantle cell lymphoma
Source: PubMed Central journal article supplement (PMC6033370; doi:10.18632/oncotarget.25558), 2018-06-19
Supplement: oncotarget-09-28547-s001.pdf [file oncotarget-09-28547-s001.pdf]

## Targeting of BMI-1 expression by the novel small molecule PTC596 in mantle cell lymphoma

### SUPPLEMENTARY MATERIALS

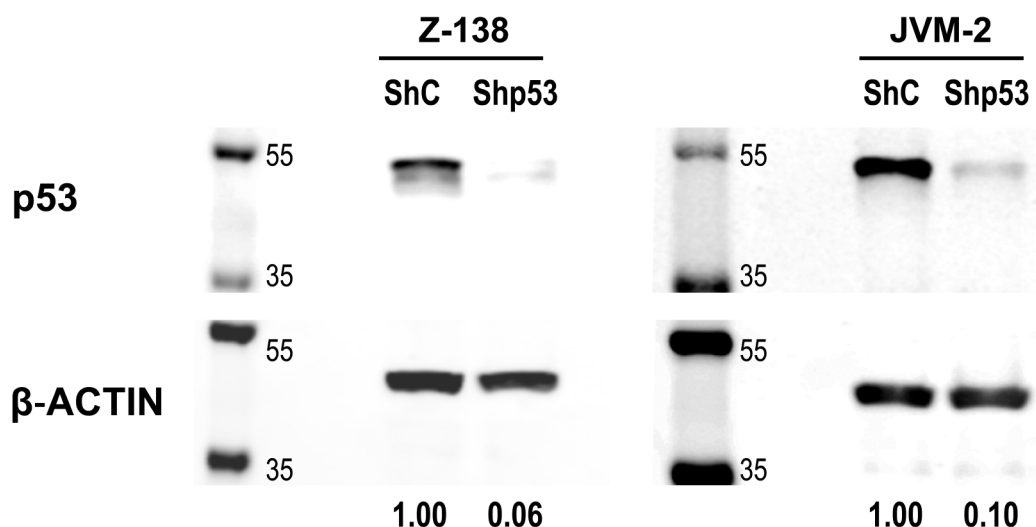

**Supplementary Figure 1:** *TP53*-shRNA reduced p53 basal levels by ~90% in MCL cell lines. p53 expression was determined in Z-138 and JVM-2, which were transduced with retroviruses encoding either scrambled shRNA (shC) or *TP53*-specific shRNA (shp53). Signal intensity was quantified and the relative intensity compared with  $\beta$ -ACTIN was calculated. Results are representative of three independent experiments.

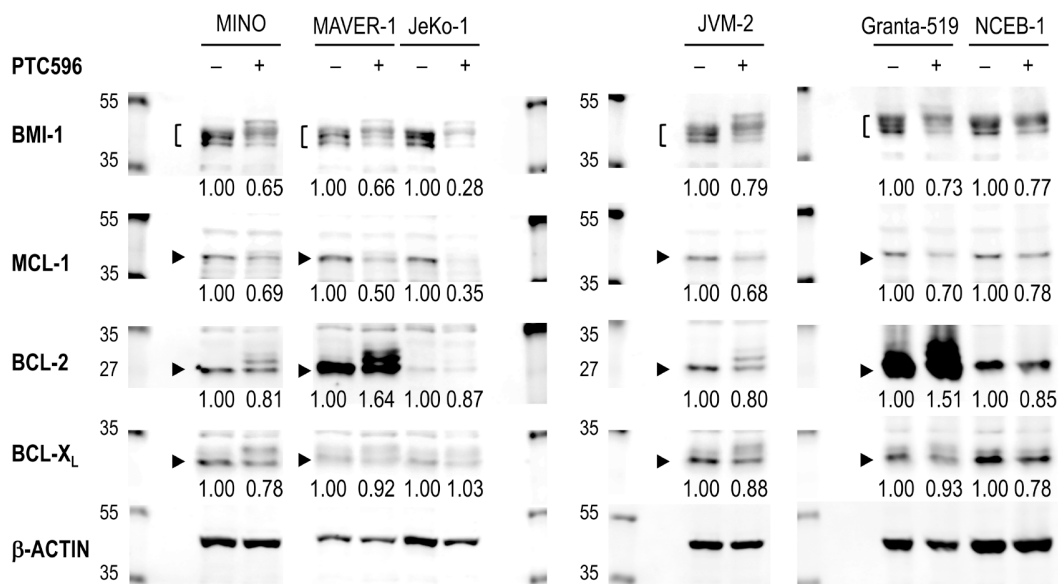

**Supplementary Figure 2:** MCL cells were treated for 24 hours with PTC596 (1  $\mu$ M in relatively insensitive JVM-2 cells and 300 nM in other cells), after which BCL-2, BCL-X<sub>L</sub> and MCL-1 protein levels were determined. The intensities of immunoblot signals were quantified and normalized to those of  $\beta$ -ACTIN. Levels in untreated cells were set at 1.0. Results are representative of three independent experiments.

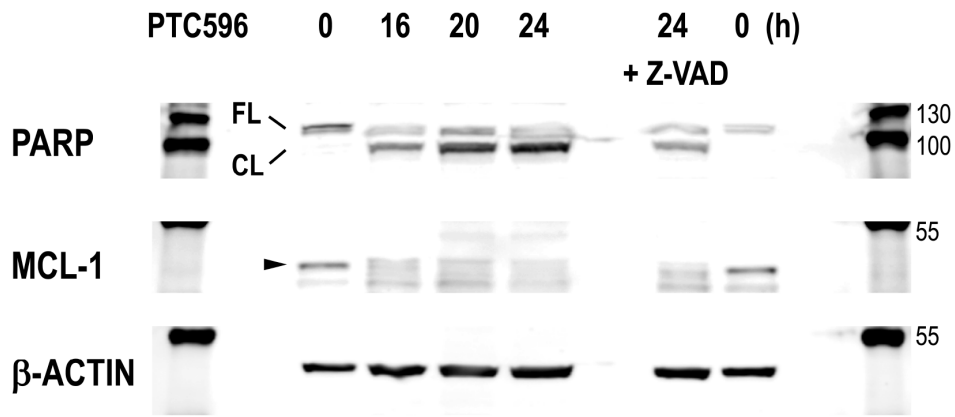

**Supplementary Figure 3: Z-138 cells were treated with 300 nM PTC596 for the indicated times, in the absence or presence of 10  $\mu$ M Z-VAD.** Comparable results were obtained in two other independent experiments. FL, full length PARP. CL, cleaved PARP.

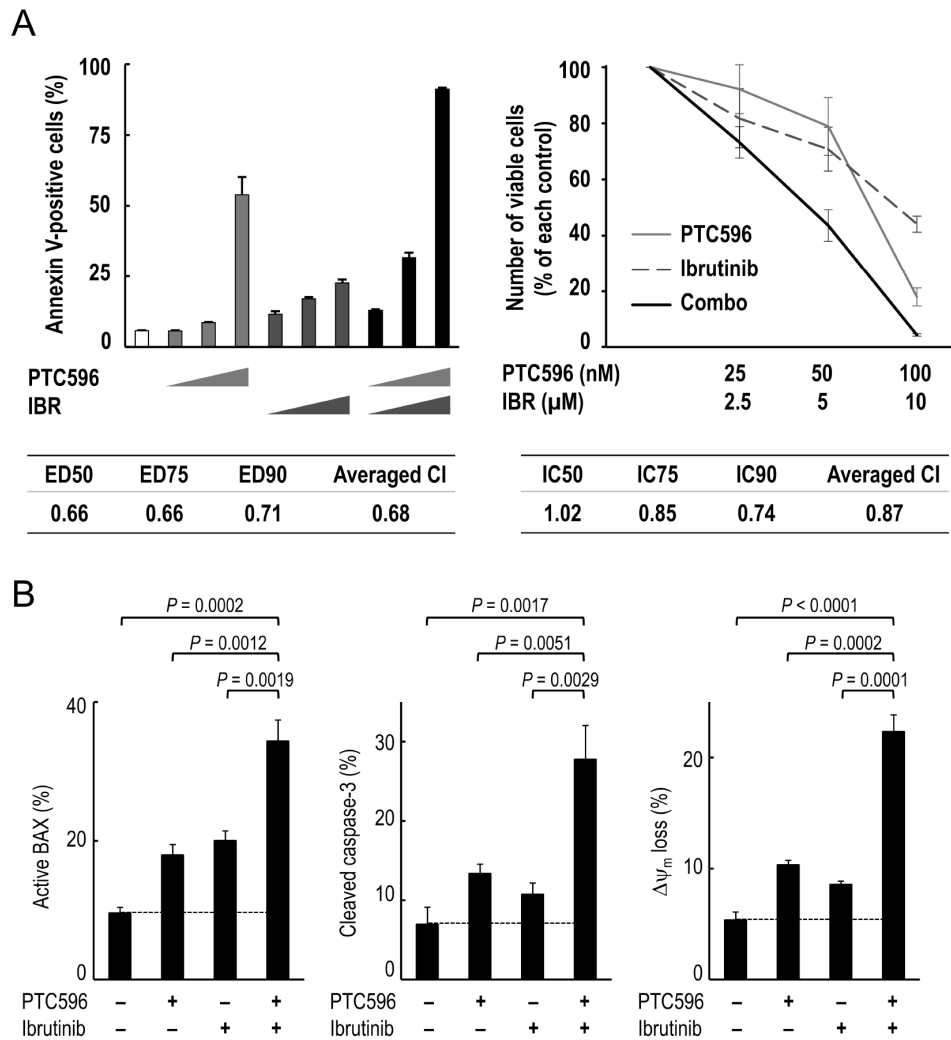

**Supplementary Figure 4: PTC596 and ibrutinib cooperatively induce mitochondrial apoptosis in mantle cell lymphoma cells.** (A) Z-138 cells were treated for 72 hours with PTC596 and ibrutinib (IBR) either as individual agents or in combination, after which the annexin V-positive fractions and the numbers of viable cells were determined. (B) BAX conformational changes, caspase-3 cleavage and  $\Delta\psi_m$  loss were determined by flow cytometry in Z-138 cells after 24-h exposure to 100 nM PTC596 and 10  $\mu$ M ibrutinib, either as individual agents or in combination. The results are expressed as the mean  $\pm$  SD.
